# Supplementary material
Source: PubMed Central journal article supplement (PMC545566)
Supplement: pnas_102_3_667__4.pdf [file pnas_102_3_667__4.pdf]

## TSC1 Phosphopeptides

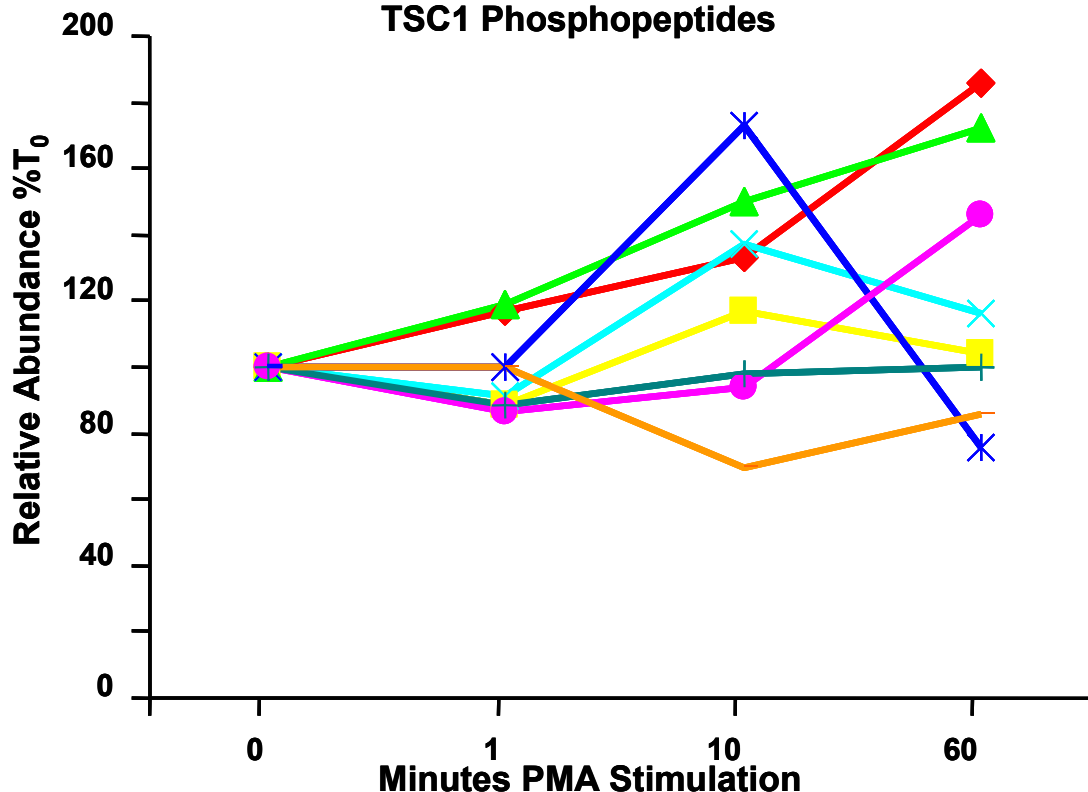

- |                                        |          |                                                |                     |
|----------------------------------------|----------|------------------------------------------------|---------------------|
| <span style="color: red;">◆</span>     | <b>A</b> | <b>NKpSESQCDEDGMTSSLSESLK</b>                  | <b>S1100</b>        |
| <span style="color: yellow;">■</span>  | <b>B</b> | <b>KThpSAASSSQGASVNPEPLHSSLDK</b>              | <b>S521</b>         |
| <span style="color: green;">▲</span>   | <b>C</b> | <b>NKSEpSQCEDEDGMTSSLSESLK</b>                 | <b>S1102</b>        |
| <span style="color: cyan;">×</span>    | <b>D</b> | <b>THSAASSSQGASVNPEPLHpSSLDK</b>               | <b>S521</b>         |
| <span style="color: blue;">✱</span>    | <b>E</b> | <b>LMLLNMPGQLPQTLSpSPSTR</b>                   | <b>S332</b>         |
| <span style="color: magenta;">●</span> | <b>F</b> | <b>ECQTSLETSIFTPpSPCK</b>                      | <b>S584 (CDK1)</b>  |
| <span style="color: teal;">+</span>    | <b>G</b> | <b>GGGGSSSSSELSpTPEKPPHQR</b>                  | <b>T1047 (CDK1)</b> |
| <span style="color: orange;">—</span>  | <b>H</b> | <b>GTPLGTPAp(TS)PPPAPLCHSDDYVHISLPQATVTPPR</b> | <b>T393 or S394</b> |
