# Supplementary material
Source: PubMed Central journal article supplement (PMC545566)

# RSK1 (pS221) AYpSFCGTVEYMAPEVVNR

t=0'

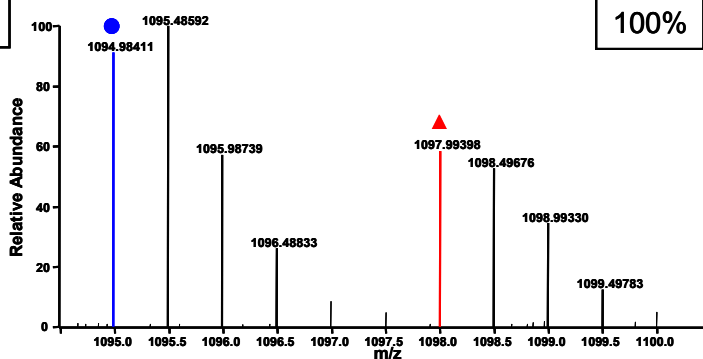

100%

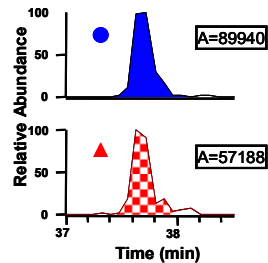

t=1'

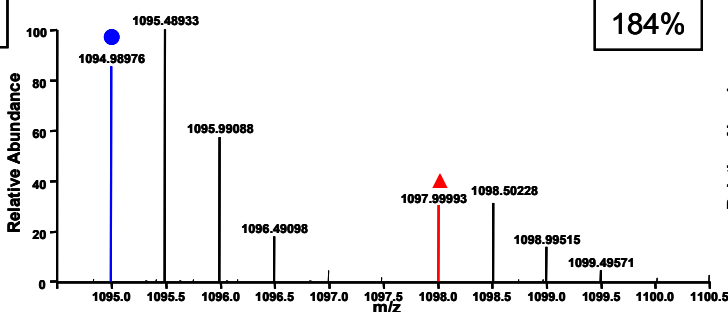

184%

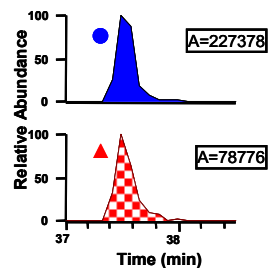

t=10'

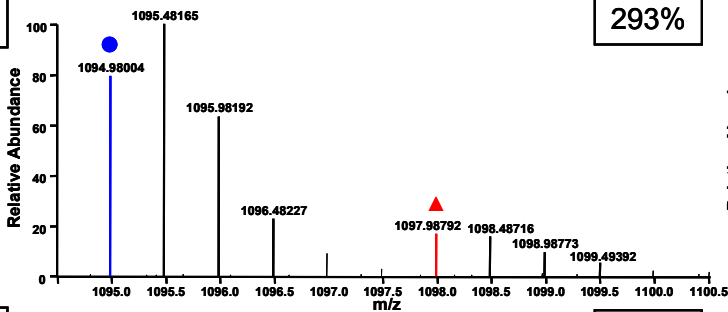

293%

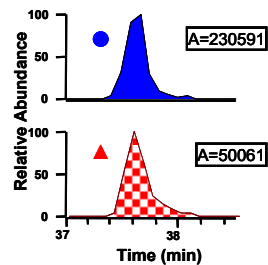

t=60'

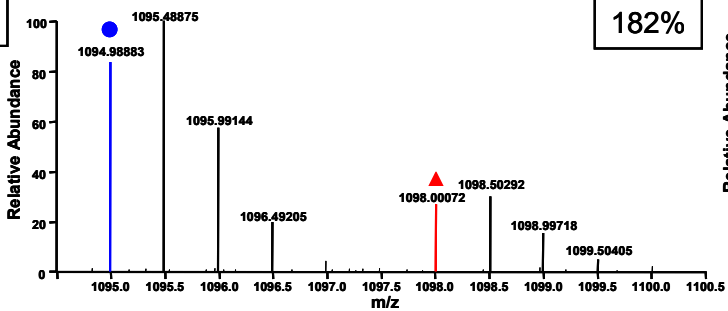

182%

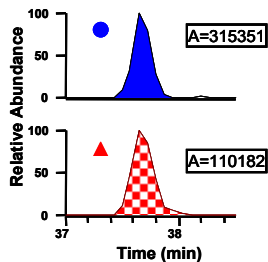

Supplement: pnas_102_3_667__1.pdf [file pnas_102_3_667__1.pdf]

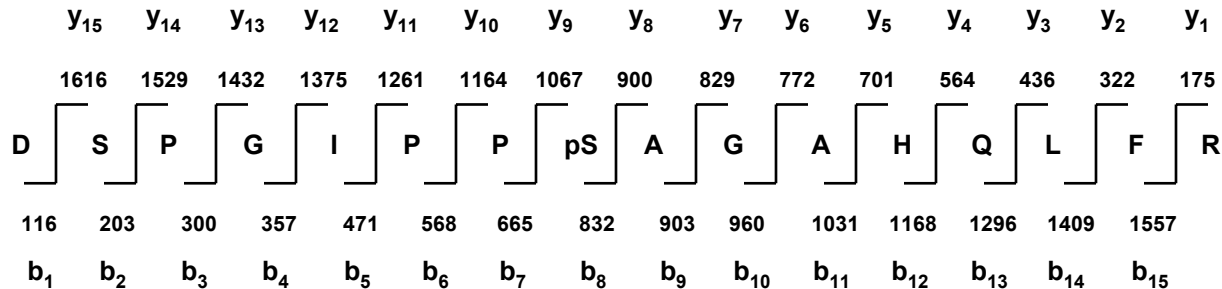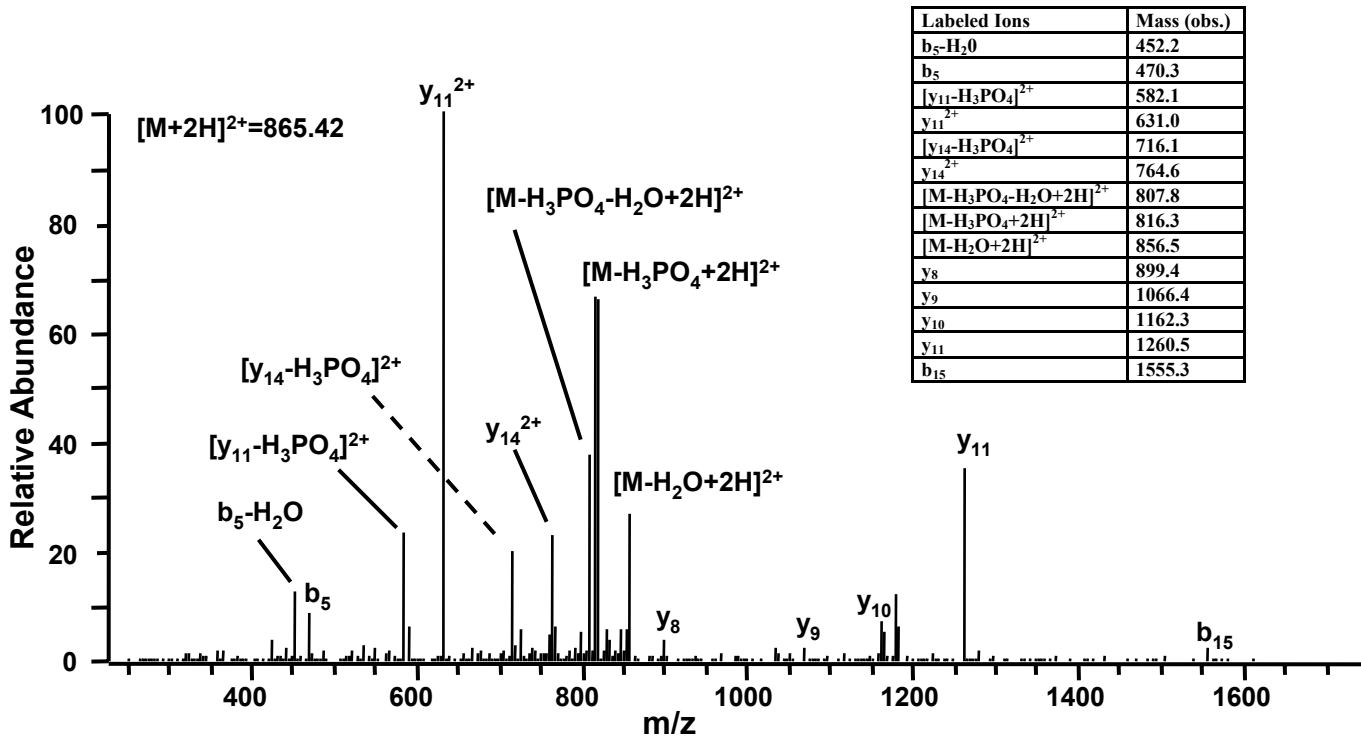

Supplement: pnas_102_3_667__2.pdf [file pnas_102_3_667__2.pdf]

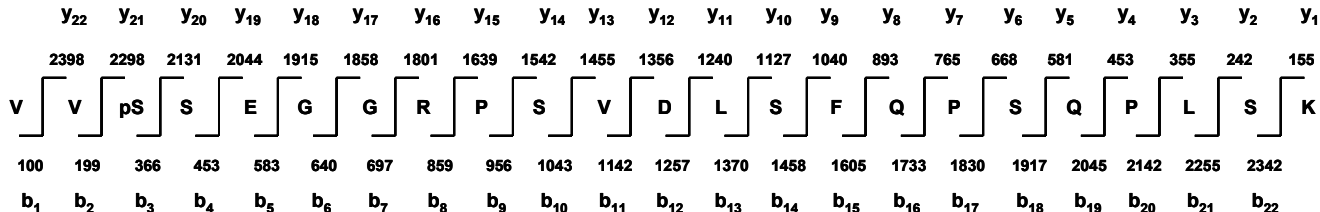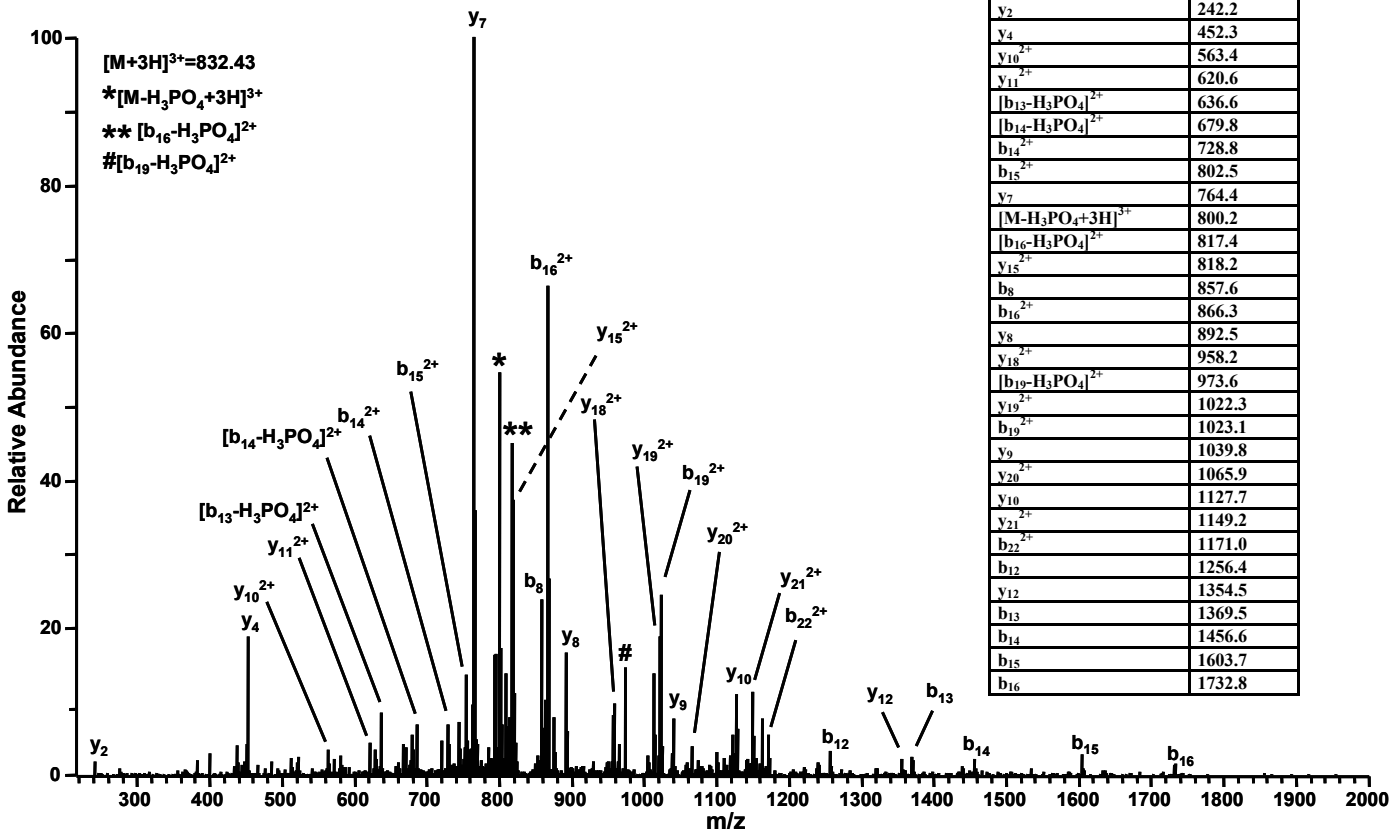

Supplement: pnas_102_3_667__3.pdf [file pnas_102_3_667__3.pdf]
